# Supplementary material for: Genome-wide identification of PbrbHLH family genes, and expression analysis in response to drought and cold stresses in pear (Pyrus bretschneideri)
Source: PubMed Central journal article supplement (PMC7874673; doi:10.1186/s12870-021-02862-5), 2021-02-09

# Genome-wide identification of *PbrbHLH* family genes, and expression analysis in response to drought and cold stresses in pear (*Pyrus bretschneideri*)

Huizhen Dong<sup>1,2</sup>, Qiming Chen<sup>1,2</sup>, Yuqin Dai, Wenjie Hu, Shaoling Zhang\* and Xiaosan Huang\*

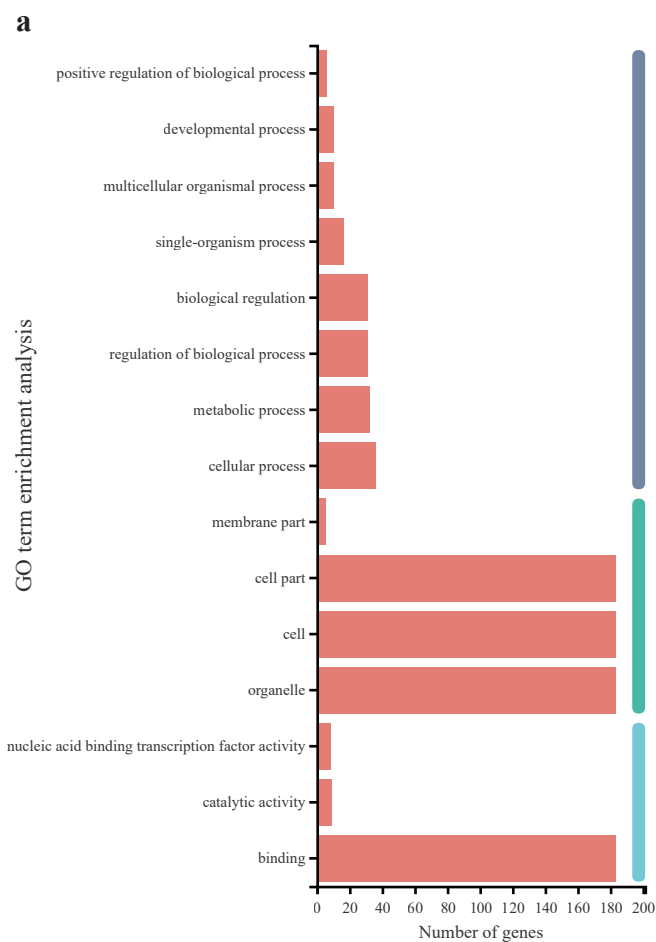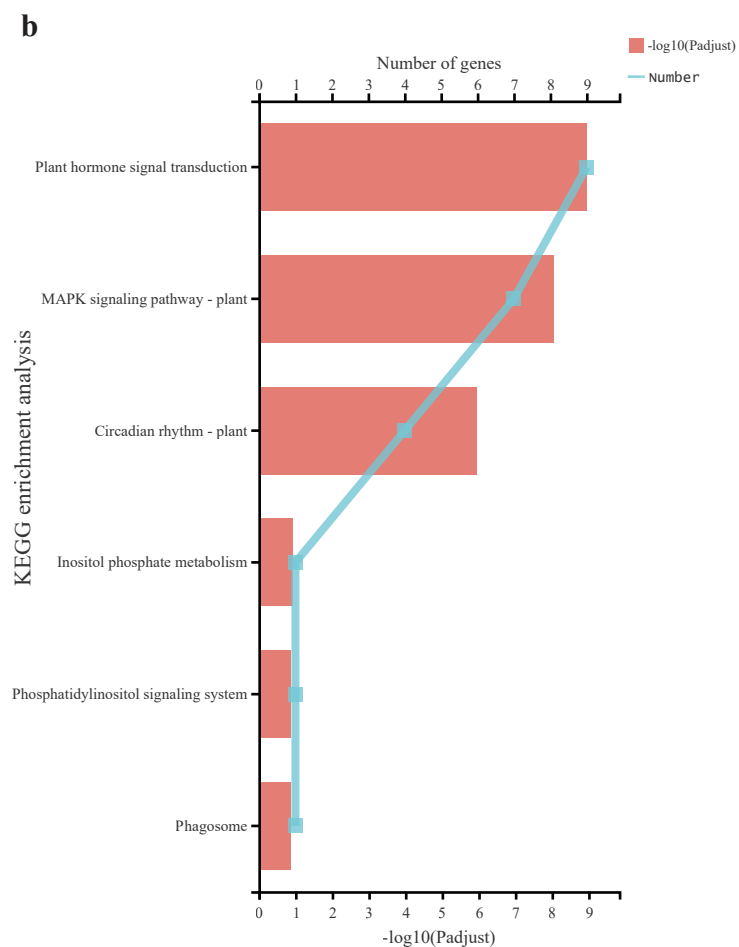

Supplement: 12870_2021_2862_MOESM2_ESM.pdf [file 12870_2021_2862_MOESM2_ESM.pdf]
